# Supplementary material for: Theoretical investigations of the substituent effect on the electronic and charge transport properties of butterfly molecules
Source: Royal Society of Chemistry journal article supplement (doi:10.1039/c9nj01767d), 2019-01-01
Supplement: c9nj01767d1.pdf [file c9nj01767d1.pdf]

# Supporting Information

## **Theoretical investigations of the substituent effect on the electronic and charge transport properties of the butterfly molecules**

Lijuan Wang, Jianhong Dai\* and Yan Song\*

School of Materials Science and Engineering, Harbin Institute of Technology at Weihai,  
2West Wenhua Road, Weihai, 264209, China.

\*E-mail: sy@hitwh.edu.cn; daijh@hit.edu.cn.

## Contents

**Figure S1.** Optimized geometries of molecules 1 to 6.

**Figure S2.** Chemical structures of molecules 1 to 6, with atom indices labeled on the structures.

**Figure S3.** Contributions of the vibrational modes to the relaxation energies for molecules 1, 3 and 5, embedded with the normal modes contribute the most for the reorganization energies of holes.

**Figure S4.** Contributions of the vibrational modes to the relaxation energies for molecules 1 and 5, embedded with the normal modes contribute the most for the reorganization energies of electrons.

**Figure S5.** The pictorial HOMO-HOMO (a), and LUMO-LUMO (b) interactions of the most prominent pathway in molecule 1 from side view and top view.

**Figure S6.** The pictorial HOMO-HOMO (a), and LUMO-LUMO (b) interactions of the most prominent pathway in molecule 2 from side view and top view.

**Figure S7.** The pictorial HOMO-HOMO (a), and LUMO-LUMO (b) interactions of the most prominent pathway in molecule 3 from side view and top view.

**Figure S8.** The pictorial HOMO-HOMO (a), and LUMO-LUMO (b) interactions of the most prominent pathway in molecule 5 from side view and top view.

**Figure S9.** The crystal packing and short contact interactions of the dominated charge hopping routes in molecules 1 to 6.

**Figure S10.** The projecting angle-dependent hopping paths to a transistor channel in the *ab* plane (a) and the calculated angle-resolved anisotropic hole (b) and electron (c) mobilities of molecule 1.

**Figure S11.** The projecting angle-dependent hopping paths to a transistor channel in the *ab* plane (a) and the calculated angle-resolved anisotropic hole (b) and electron (c) mobilities of molecule 2.

**Figure S12.** The projecting angle-dependent hopping paths to a transistor channel in the *ab* plane (a) and the calculated angle-resolved anisotropic hole (b) and electron (c) mobilities of molecule 3.

**Figure S13.** The projecting angle-dependent hopping paths to a transistor channel in the *ab* plane (a) and the calculated angle-resolved anisotropic hole (b) and electron (c) mobilities of molecule 5.

**Figure S14.** Plots of the reduced density gradient versus the electron density multiplied by the sign of the second Hessian eigenvalue. The data are obtained at B3LYP-D3/6-311G\* level.

**Figure S15.** Gradient isosurfaces for (a) dimer 1 of molecule 3, (b) dimer 1 of molecule 4, and (c) dimer 1 of molecule 6. The surfaces are colored on a blue-green-red scale according to values of  $\text{sign}(\lambda_2)\rho$ , ranging from -0.04 to 0.02 au. Blue indicates strong attractive interactions,

green indicates Van der Waals interactions and red indicates strong repulsion.

**Table S1.** The selected optimized bond lengths, bond angle and dihedral angles of molecules 1 to 3 in the neutral and ionic states, together with experimental values (the unit of bond lengths is in angstroms, and the bond angles and dihedral angles are in degrees).

**Table S2.** The selected optimized bond lengths, bond angle and dihedral angles of molecules 4 to 6 in the neutral and ionic states, together with experimental values (the unit of bond lengths is in angstroms, and the bond angles and dihedral angles are in degrees).

**Table S3.** The transfer integrals of hole ( $V_{\text{hole}}$ ) and electron ( $V_{\text{electron}}$ ) (absolute value) for different hopping pathways of molecules 1 to 6 based on B3LYP/6-31G(d, p) level.

**Table S4.** The calculated average mobilities of hole ( $\mu_{\text{h,ave.}}$ ) and electron ( $\mu_{\text{e,ave.}}$ ) of molecules 1 to 6 based on B3LYP/6-31G (d, p) level.

**Table S5** Intermolecular interaction energies for the most prominent dimers of molecules 3, 4 and 6.

**Table S6.** The reorganization energies of hole ( $\lambda^+$ ) and electron ( $\lambda^-$ ) using adiabatic potential energy surfaces (APES) approach, the HOMO, LUMO energies, as well as the vertical and adiabatic ionization potentials ( $IP_V$ ,  $IP_A$ ) and electron affinities ( $EA_V$ ,  $EA_A$ ) of molecule 6 at B3LYP-D3/6-31G (d, p) level: All the data are in unit of eV.

**Table S7** The transfer integrals of hole ( $V_{\text{hole}}$ ) and electron ( $V_{\text{electron}}$ ) (absolute value) for different hopping pathways and charge mobilities of hole and electron for molecule 6 based on B3LYP-D3/6-31G(d, p) level.

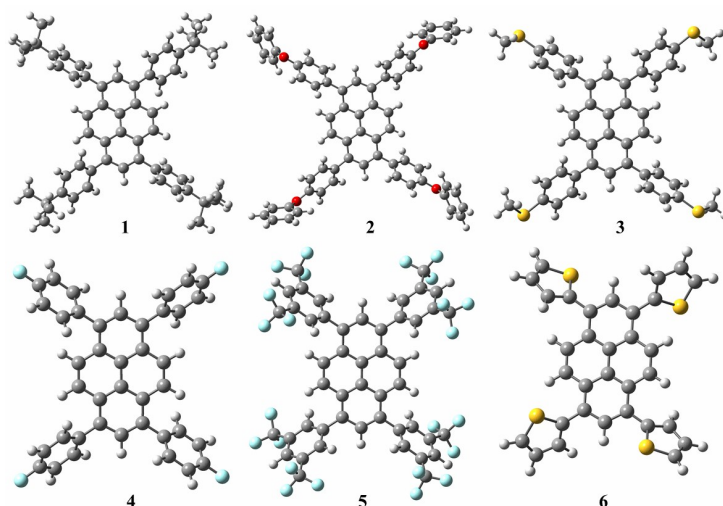

**Figure S1.** Optimized geometries of molecules 1 to 6.

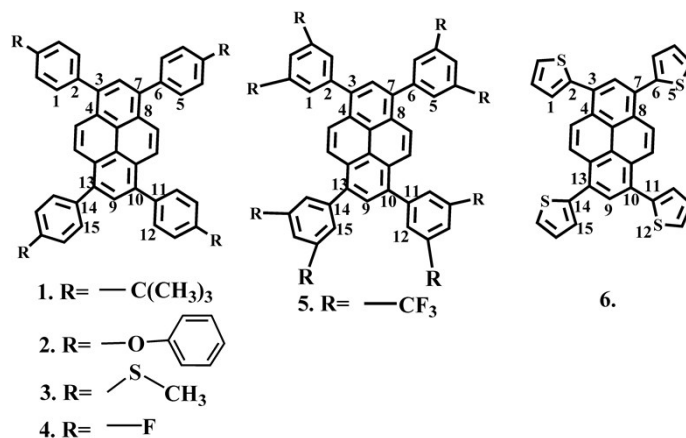

**Figure S2.** Chemical structures of molecules 1 to 6, with atom indices labeled on the structures.

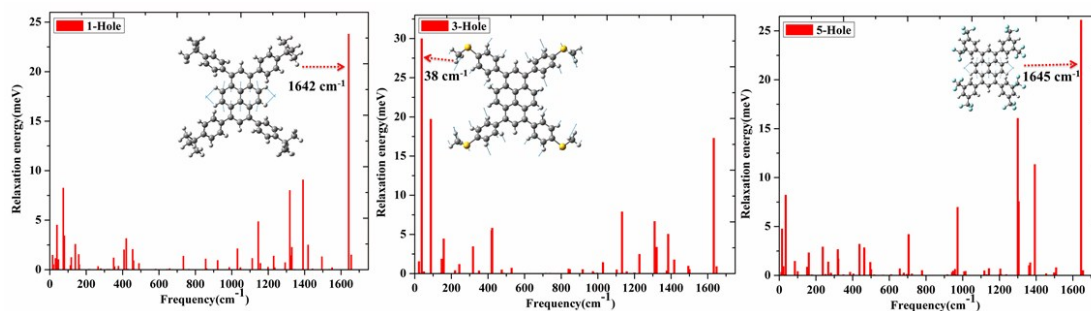

**Figure S3.** Contributions of the vibrational modes to the relaxation energies for molecules 1, 3 and 5, embedded with the normal modes contribute the most for the reorganization energies of holes.

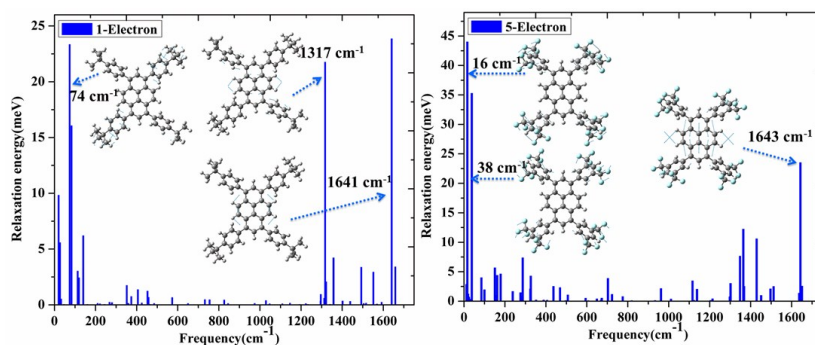

**Figure S4.** Contributions of the vibrational modes to the relaxation energies for molecules 1 and 5, embedded with the normal modes contribute the most for the reorganization energies of electrons.

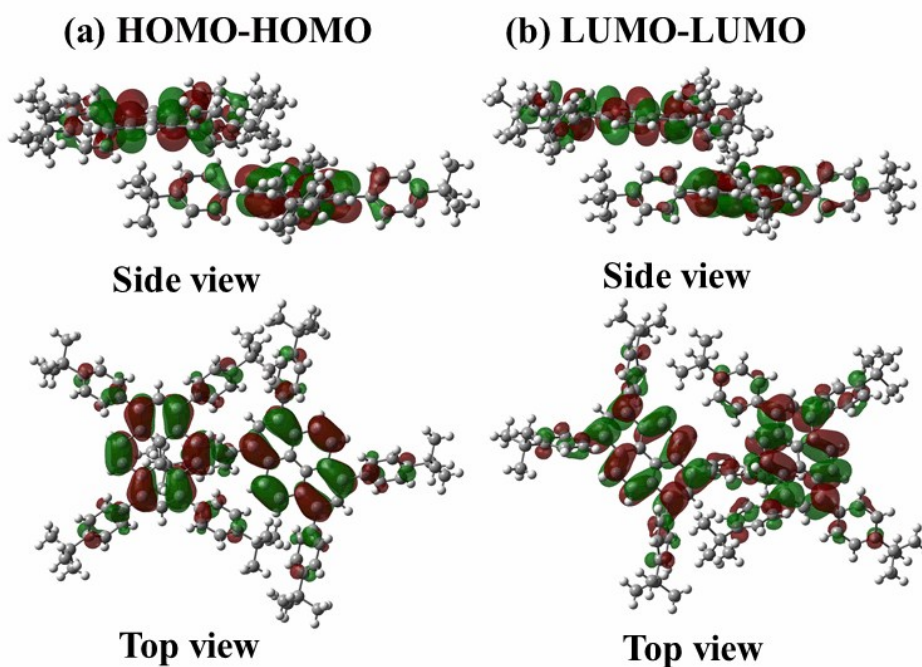

**Figure S5.** The pictorial HOMO-HOMO (a), and LUMO-LUMO (b) interactions of the most prominent pathway in molecule 1 from side view and top view.

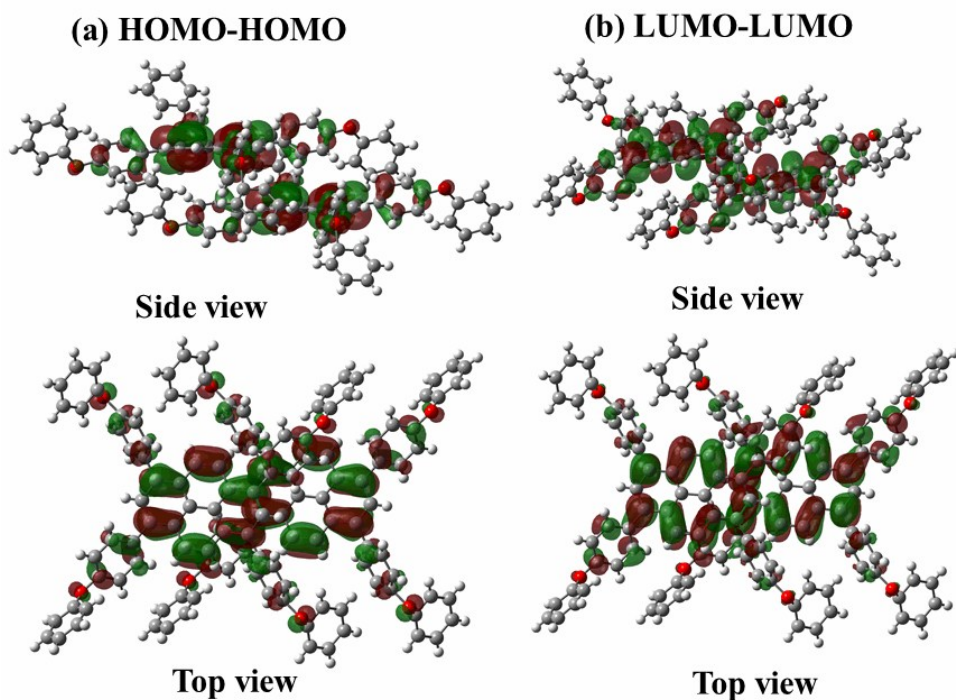

**Figure S6.** The pictorial HOMO-HOMO (a), and LUMO-LUMO (b) interactions of the most prominent pathway in molecule 2 from side view and top view.

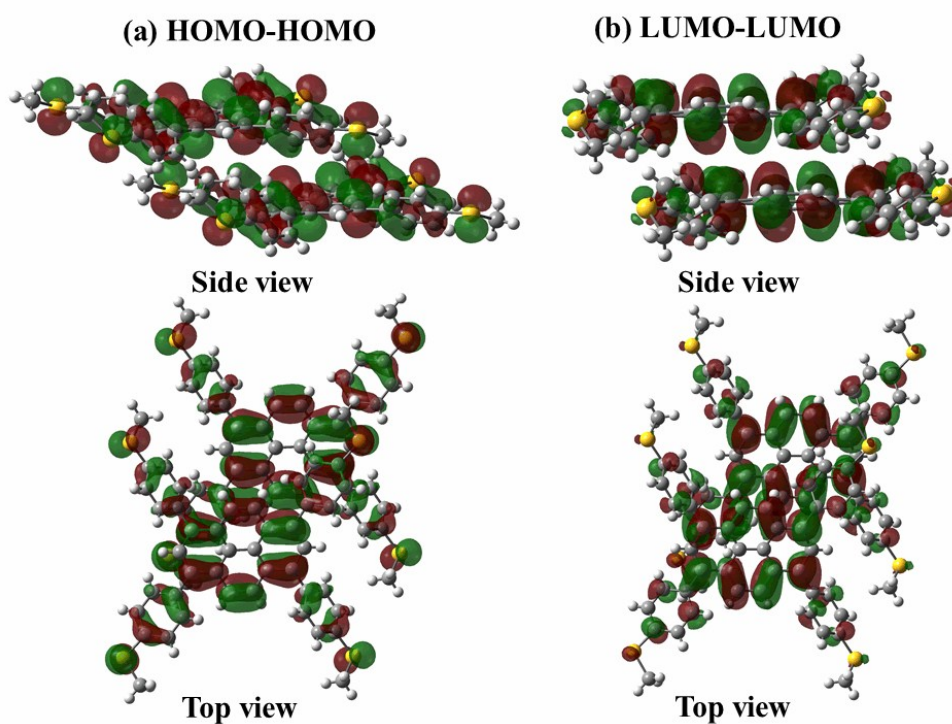

**Figure S7.** The pictorial HOMO-HOMO (a), and LUMO-LUMO (b) interactions of the most prominent pathway in molecule 3 from side view and top view.



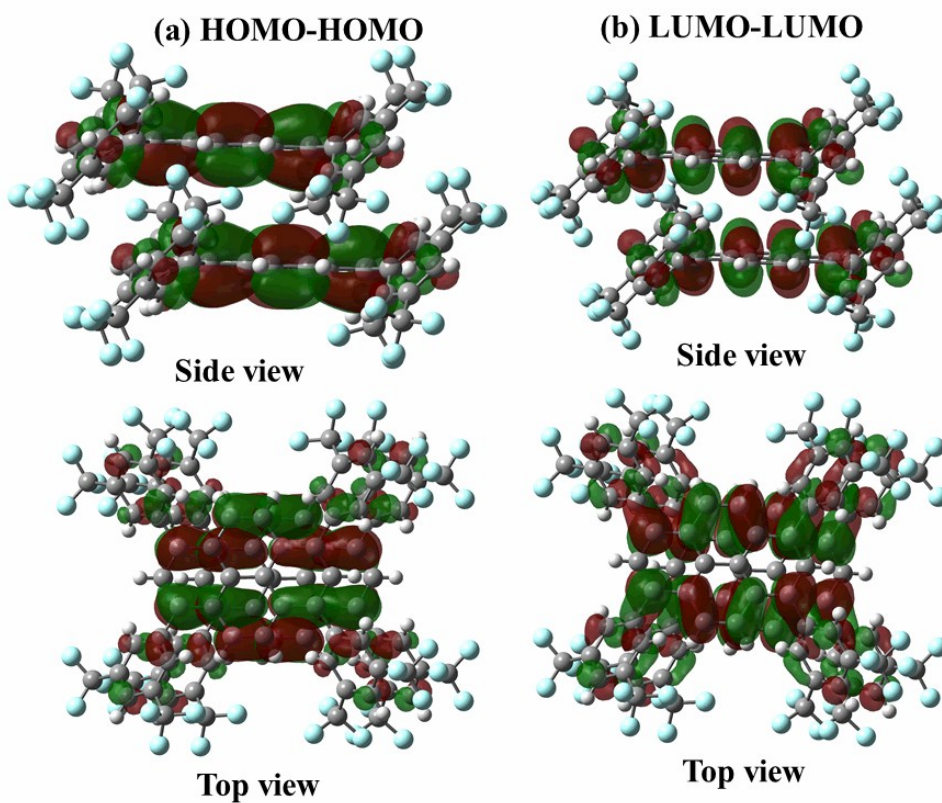

**Figure S8.** The pictorial HOMO-HOMO (a), and LUMO-LUMO (b) interactions of the most prominent pathway in molecule 5 from side view and top view.

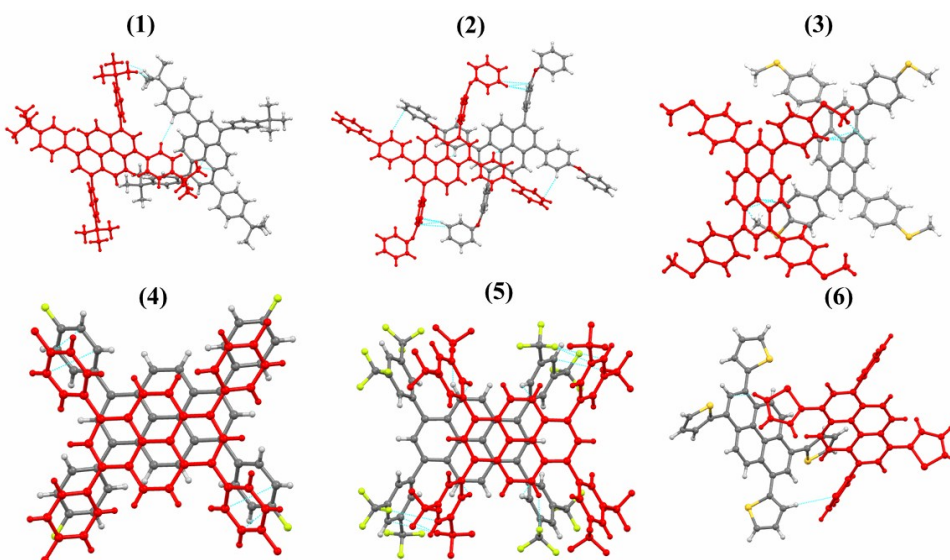

**Figure S9.** The crystal packing and short contact interactions of the dominated charge hopping routes in molecules 1 to 6.

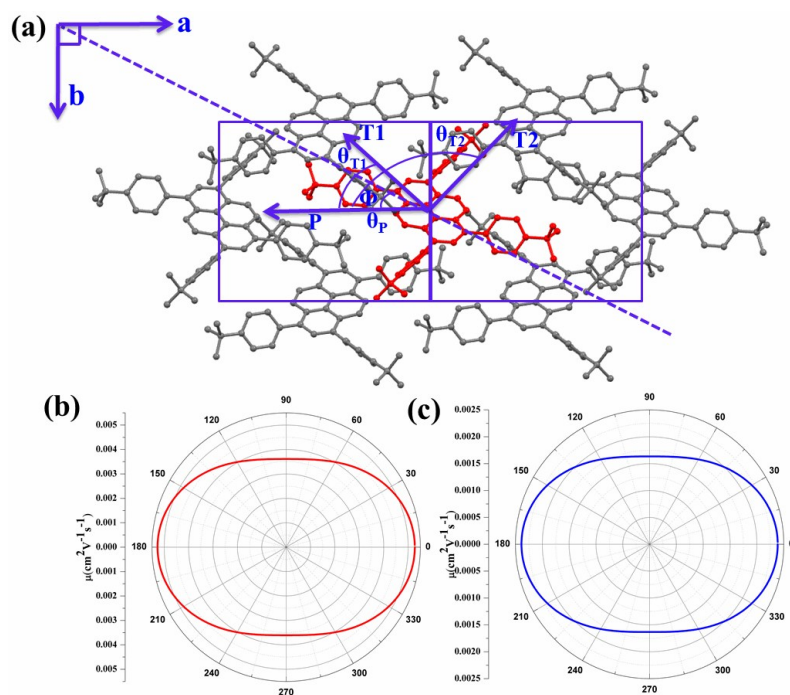

**Figure S10.** The projecting angle-dependent hopping paths to a transistor channel in the  $ab$  plane (a) and the calculated angle-resolved anisotropic hole (b) and electron (c) mobilities of molecule 1.

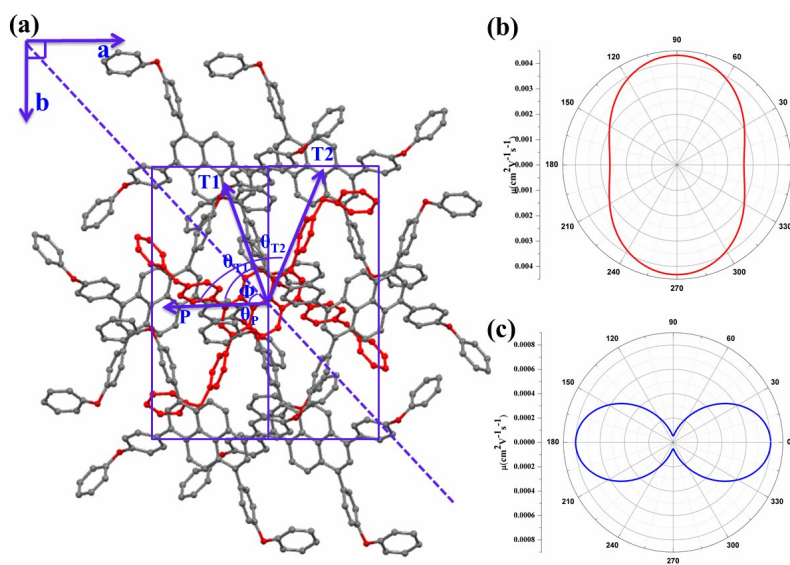

**Figure S11.** The projecting angle-dependent hopping paths to a transistor channel in the  $ab$  plane (a) and the calculated angle-resolved anisotropic hole (b) and electron (c) mobilities of molecule 2.



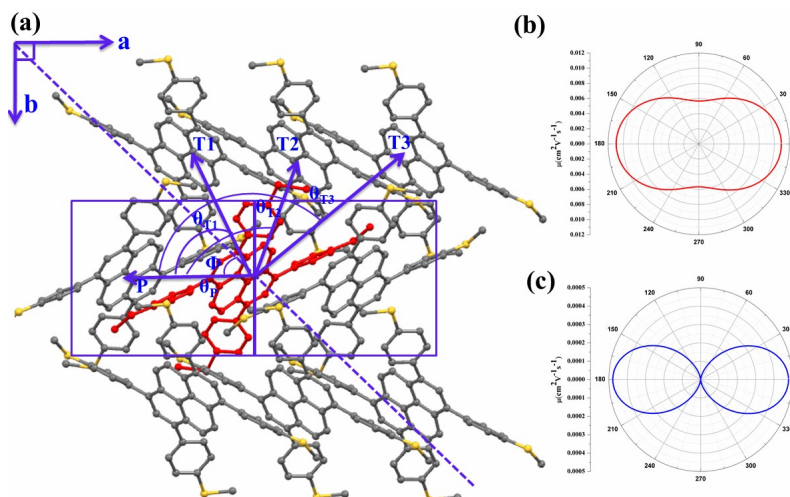

**Figure S12.** The projecting angle-dependent hopping paths to a transistor channel in the  $ab$  plane (a) and the calculated angle-resolved anisotropic hole (b) and electron (c) mobilities of molecule 3.

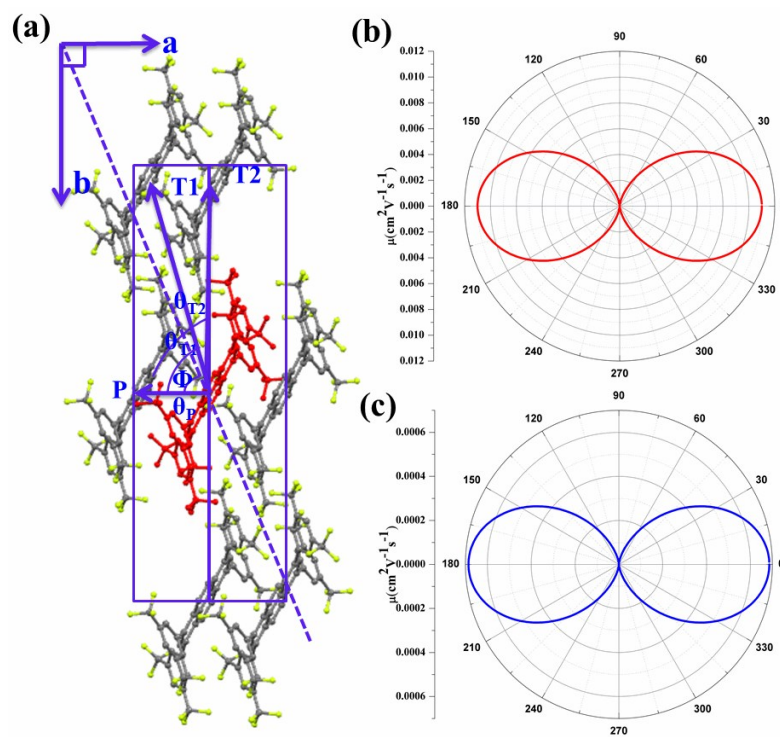

**Figure S13.** The projecting angle-dependent hopping paths to a transistor channel in the  $ab$  plane (a) and the calculated angle-resolved anisotropic hole (b) and electron (c) mobilities of molecule 5.

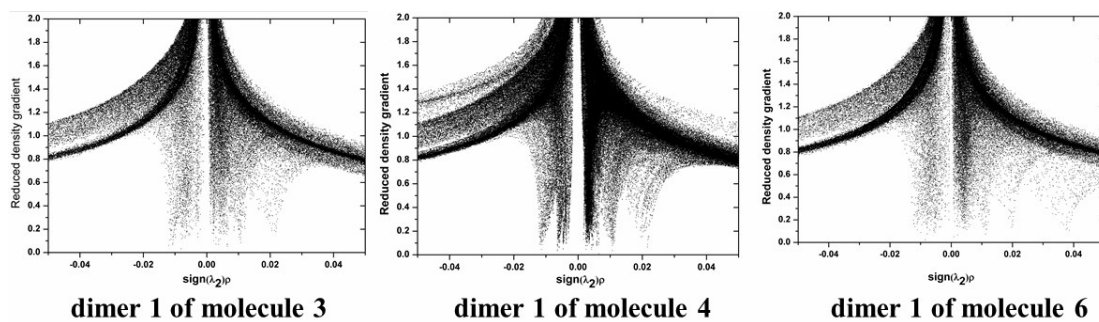

**Figure S14.** Plots of the reduced density gradient versus the electron density multiplied by the sign of the second Hessian eigenvalue. The data are obtained at B3LYP-D3/6-311G\* level.

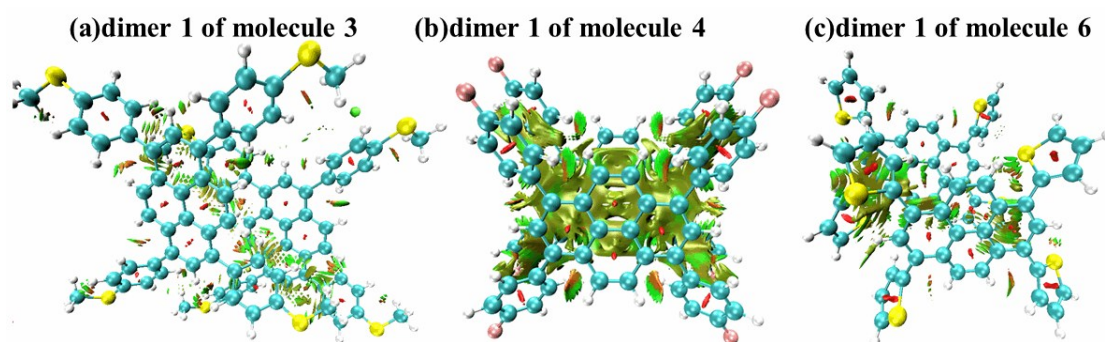

**Figure S15.** Gradient isosurfaces for (a) dimer1 of molecule 3, (b) dimer 1 of molecule 4, and (c) dimer 1 of molecule 6. The surfaces are colored on a blue-green-red scale according to values of  $\text{sign}(\lambda_2)\rho$ , ranging from -0.04 to 0.02 au. Blue indicates strong attractive interactions, green indicates Van der Waals interactions and red indicates strong repulsion.

**Table S1.** The selected optimized bond lengths, bond angles and dihedral angles of molecules 1 to 3 in the neutral and ionic states, together with experimental values<sup>1</sup> (the unit of bond lengths is in angstroms, and the bond angles and dihedral angles are in degrees).

| Molecule                  | Bond Parameters           | Neutral | Expt. <sup>1</sup> | Cationic | Anionic |
|---------------------------|---------------------------|---------|--------------------|----------|---------|
| 1                         | R(C2-C3)                  | 1.49    | 1.49               | 1.48     | 1.48    |
|                           | R(C6-C7)                  | 1.49    | 1.49               | 1.48     | 1.48    |
|                           | R(C10-C11)                | 1.49    | 1.49               | 1.48     | 1.48    |
|                           | R(C13-C14)                | 1.49    | 1.49               | 1.48     | 1.48    |
|                           | $\theta$ (C2-C3-C4)       | 122.9   | 121.6              | 122.7    | 123.4   |
|                           | $\theta$ (C6-C7-C8)       | 122.8   | 121.2              | 122.7    | 123.3   |
|                           | $\theta$ (C9-C10-C11)     | 118.2   | 119.1              | 118.7    | 118.2   |
|                           | $\theta$ (C9-C13-C14)     | 118.3   | 119.6              | 118.7    | 118.3   |
|                           | $\theta$ (C1-C2-C3-C4)    | 53.5    | 53.6               | 48.5     | 45.1    |
|                           | $\theta$ (C5-C6-C7-C8)    | 54.5    | 57.5               | 48.7     | 45.2    |
|                           | $\theta$ (C9-C10-C11-C12) | 50.2    | 51.5               | 44.7     | 41.9    |
| $\theta$ (C9-C13-C14-C15) | 51.1                      | 55.5    | 44.9               | 42.1     |         |
| 2                         | R(C2-C3)                  | 1.49    | 1.48               | 1.47     | 1.48    |
|                           | R(C6-C7)                  | 1.49    | 1.48               | 1.47     | 1.48    |
|                           | R(C10-C11)                | 1.49    | 1.48               | 1.47     | 1.48    |
|                           | R(C13-C14)                | 1.49    | 1.48               | 1.47     | 1.48    |
|                           | $\theta$ (C2-C3-C4)       | 122.8   | 123.5              | 122.7    | 123.2   |
|                           | $\theta$ (C6-C7-C8)       | 122.8   | 122.4              | 122.8    | 123.3   |
|                           | $\theta$ (C9-C10-C11)     | 118.3   | 118.0              | 118.8    | 118.3   |
|                           | $\theta$ (C9-C13-C14)     | 118.3   | 118.4              | 118.7    | 118.2   |
|                           | $\theta$ (C1-C2-C3-C4)    | 55.1    | 45.8               | 47.0     | 46.3    |
|                           | $\theta$ (C5-C6-C7-C8)    | 55.8    | 65.9               | 47.0     | 45.8    |
|                           | $\theta$ (C9-C10-C11-C12) | 51.6    | 39.3               | 43.1     | 43.1    |
| $\theta$ (C9-C13-C14-C15) | 52.4                      | 64.8    | 42.8               | 42.8     |         |
| 3                         | R(C2-C3)                  | 1.49    | 1.49               | 1.47     | 1.48    |
|                           | R(C6-C7)                  | 1.49    | 1.50               | 1.47     | 1.48    |
|                           | R(C10-C11)                | 1.49    | 1.49               | 1.47     | 1.48    |
|                           | R(C13-C14)                | 1.49    | 1.50               | 1.47     | 1.48    |
|                           | $\theta$ (C2-C3-C4)       | 122.9   | 122.1              | 122.9    | 123.5   |
|                           | $\theta$ (C6-C7-C8)       | 122.9   | 123.9              | 122.9    | 123.5   |
|                           | $\theta$ (C9-C10-C11)     | 118.2   | 118.8              | 118.6    | 118.1   |
|                           | $\theta$ (C9-C13-C14)     | 118.2   | 117.7              | 118.6    | 118.1   |
|                           | $\theta$ (C1-C2-C3-C4)    | 54.9    | 52.2               | 47.1     | 44.4    |
|                           | $\theta$ (C5-C6-C7-C8)    | 54.9    | 43.3               | 47.1     | 44.4    |
|                           | $\theta$ (C9-C10-C11-C12) | 51.3    | 49.9               | 42.9     | 41.7    |
| $\theta$ (C9-C13-C14-C15) | 51.3                      | 38.2    | 42.9               | 41.7     |         |

**Table S2.** The selected optimized bond lengths, bond angles and dihedral angles of molecules 4 to 6 in the neutral and ionic states, together with experimental values<sup>1</sup> (the unit of bond lengths is in angstroms, and the bond angles and dihedral angles are in degrees).

| Molecule                  | Bond Parameters           | Neutral | Expt. <sup>1</sup> | Cationic | Anionic |
|---------------------------|---------------------------|---------|--------------------|----------|---------|
| 4                         | R(C2-C3)                  | 1.49    | 1.49               | 1.48     | 1.48    |
|                           | R(C6-C7)                  | 1.49    | 1.50               | 1.48     | 1.48    |
|                           | R(C10-C11)                | 1.49    | 1.49               | 1.48     | 1.48    |
|                           | R(C13-C14)                | 1.49    | 1.50               | 1.48     | 1.48    |
|                           | $\theta$ (C2-C3-C4)       | 122.8   | 122.6              | 122.7    | 123.2   |
|                           | $\theta$ (C6-C7-C8)       | 122.8   | 123.3              | 122.7    | 123.2   |
|                           | $\theta$ (C9-C10-C11)     | 118.3   | 119.0              | 118.7    | 118.3   |
|                           | $\theta$ (C9-C13-C14)     | 118.3   | 118.0              | 118.7    | 118.3   |
|                           | $\theta$ (C1-C2-C3-C4)    | 55.7    | 45.6               | 48.8     | 46.5    |
|                           | $\theta$ (C5-C6-C7-C8)    | 55.8    | 45.2               | 49.0     | 46.5    |
|                           | $\theta$ (C9-C10-C11-C12) | 52.3    | 39.4               | 45.0     | 43.1    |
| $\theta$ (C9-C13-C14-C15) | 52.4                      | 41.7    | 45.1               | 43.2     |         |
| 5                         | R(C2-C3)                  | 1.49    | 1.49               | 1.48     | 1.48    |
|                           | R(C6-C7)                  | 1.49    | 1.49               | 1.48     | 1.48    |
|                           | R(C10-C11)                | 1.49    | 1.49               | 1.48     | 1.48    |
|                           | R(C13-C14)                | 1.49    | 1.50               | 1.48     | 1.48    |
|                           | $\theta$ (C2-C3-C4)       | 122.7   | 120.8              | 122.7    | 123.5   |
|                           | $\theta$ (C6-C7-C8)       | 122.8   | 120.6              | 122.8    | 123.6   |
|                           | $\theta$ (C9-C10-C11)     | 118.0   | 119.6              | 118.2    | 117.7   |
|                           | $\theta$ (C9-C13-C14)     | 117.9   | 119.5              | 118.2    | 117.6   |
|                           | $\theta$ (C1-C2-C3-C4)    | 59.0    | 51.8               | 52.6     | 46.5    |
|                           | $\theta$ (C5-C6-C7-C8)    | 57.2    | 54.7               | 51.5     | 45.9    |
|                           | $\theta$ (C9-C10-C11-C12) | 57.2    | 54.1               | 51.2     | 46.2    |
| $\theta$ (C9-C13-C14-C15) | 55.3                      | 51.4    | 50.2               | 45.6     |         |
| 6                         | R(C2-C3)                  | 1.47    | 1.48               | 1.46     | 1.46    |
|                           | R(C6-C7)                  | 1.48    | 1.49               | 1.46     | 1.46    |
|                           | R(C10-C11)                | 1.47    | 1.48               | 1.46     | 1.46    |
|                           | R(C13-C14)                | 1.48    | 1.49               | 1.46     | 1.46    |
|                           | $\theta$ (C2-C3-C4)       | 122.3   | 121.3              | 122.1    | 122.7   |
|                           | $\theta$ (C6-C7-C8)       | 123.7   | 122.7              | 124.0    | 124.4   |
|                           | $\theta$ (C9-C10-C11)     | 118.8   | 119.1              | 119.4    | 118.8   |
|                           | $\theta$ (C9-C13-C14)     | 117.3   | 117.6              | 117.4    | 117.0   |
|                           | $\theta$ (C1-C2-C3-C4)    | 48.3    | 55.4               | 40.2     | 39.0    |
|                           | $\theta$ (S5-C6-C7-C8)    | 55.3    | 60.5               | 42.6     | 45.5    |
|                           | $\theta$ (C9-C10-C11-S12) | 44.9    | 53.6               | 34.7     | 36.3    |
|                           | $\theta$ (C9-C13-C14-C15) | 47.5    | 55.9               | 35.0     | 36.9    |

**Table S3.** The transfer integrals of hole ( $V_{\text{hole}}$ ) and electron ( $V_{\text{electron}}$ ) (absolute value) for different hopping pathways of molecules 1 to 6 based on B3LYP/6-31G(d, p) level.

| <b>Molecule</b> | <b>Pathway</b> | <b>Distance (<math>\text{\AA}</math>)</b> | <b><math>V_{\text{hole}}</math> (meV)</b> | <b><math>V_{\text{electron}}</math> (meV)</b> |
|-----------------|----------------|-------------------------------------------|-------------------------------------------|-----------------------------------------------|
| 1               | 1, 2, 3, 4     | 9.64                                      | 3.3                                       | 3.7                                           |
|                 | 5, 6, 7, 8     | 13.76                                     | 1.2                                       | 0.7                                           |
|                 | 9, 10, 11, 12  | 13.13                                     | 0.1                                       | 1.3                                           |
| 2               | 1, 2           | 7.20                                      | 18.6                                      | 9.4                                           |
|                 | 3, 4           | 14.61                                     | $9.2 \times 10^{-4}$                      | $3.6 \times 10^{-4}$                          |
|                 | 5, 6, 7, 8     | 10.47                                     | 8.2                                       | 3.0                                           |
|                 | 9, 10          | 19.36                                     | 0.04                                      | 0.04                                          |
|                 | 11, 12, 13, 14 | 16.46                                     | 0.09                                      | 0.02                                          |
| 3               | 1, 2           | 6.99                                      | 3.9                                       | 9.7                                           |
|                 | 3, 4, 5, 6     | 8.89                                      | 4.7                                       | 0.2                                           |
|                 | 7, 8           | 13.30                                     | 1.2                                       | 2.0                                           |
|                 | 9, 10, 11, 12  | 15.34                                     | 4.7                                       | 0.7                                           |
|                 | 13, 14         | 17.63                                     | 0.2                                       | 0.6                                           |
|                 | 15, 16         | 18.97                                     | 2.6                                       | 0.7                                           |
| 4               | 1, 2           | 3.91                                      | 18.7                                      | 27.9                                          |
|                 | 3, 4           | 12.56                                     | 0.2                                       | 0.3                                           |
|                 | 5, 6           | 12.56                                     | $1.7 \times 10^{-3}$                      | 0.01                                          |
|                 | 7, 8           | 11.93                                     | 1.3                                       | 0.1                                           |
|                 | 9, 10, 11, 12  | 15.31                                     | 0.3                                       | 0.2                                           |
|                 | 13, 14, 15, 16 | 15.26                                     | 0.2                                       | 0.06                                          |
| 5               | 1, 2           | 4.80                                      | 9.9                                       | 6.3                                           |
|                 | 3, 4           | 15.13                                     | 0.05                                      | 0.2                                           |
|                 | 5, 6           | 14.35                                     | 0.03                                      | $3.9 \times 10^{-4}$                          |
|                 | 7, 8, 9, 10    | 16.38                                     | 0.05                                      | 0.07                                          |
|                 | 11, 12, 13, 14 | 16.22                                     | 0.02                                      | 0.04                                          |
| 6               | 1, 2, 3, 4     | 6.93                                      | 18.2                                      | 3.0                                           |
|                 | 5, 6           | 10.99                                     | 5.9                                       | 3.5                                           |
|                 | 7, 8, 9, 10    | 13.38                                     | 0.3                                       | 2.0                                           |
|                 | 11, 12, 13, 14 | 17.08                                     | $1.3 \times 10^{-3}$                      | $6.8 \times 10^{-4}$                          |
|                 | 15, 16         | 13.98                                     | 2.2                                       | 2.8                                           |
|                 | 17, 18         | 13.69                                     | 5.8                                       | 4.1                                           |

**Table S4.** The calculated average mobilities of hole ( $\mu_{h,ave.}$ ) and electron ( $\mu_{e,ave.}$ ) of molecules 1 to 6 based on B3LYP/6-31G (d, p) level.

| <b>Molecule</b> | <b><math>\mu_{h,ave.}</math> (cm<sup>2</sup>V<sup>-1</sup>s<sup>-1</sup>)</b> | <b><math>\mu_{e,ave.}</math> (cm<sup>2</sup>V<sup>-1</sup>s<sup>-1</sup>)</b> |
|-----------------|-------------------------------------------------------------------------------|-------------------------------------------------------------------------------|
| 1               | $2.8 \times 10^{-3}$                                                          | $1.4 \times 10^{-3}$                                                          |
| 2               | $3.9 \times 10^{-3}$                                                          | $3.6 \times 10^{-4}$                                                          |
| 3               | 0.01                                                                          | $1.2 \times 10^{-4}$                                                          |
| 4               | 0.01                                                                          | 0.01                                                                          |
| 5               | $4.6 \times 10^{-3}$                                                          | $3.2 \times 10^{-4}$                                                          |
| 6               | 0.02                                                                          | $2.9 \times 10^{-3}$                                                          |

**Table S5** Intermolecular interaction energies for the most prominent dimers of molecules 3, 4 and 6.

| <b>Dimers</b>         | <b>Interaction energies (kcal/mol)</b> |
|-----------------------|----------------------------------------|
| Dimer 1 of molecule 3 | -31.75                                 |
| Dimer 1 of molecule 4 | -36.81                                 |
| Dimer 1 of molecule 6 | -24.74                                 |

**Table S6.** The reorganization energies of hole ( $\lambda^+$ ) and electron ( $\lambda^-$ ) using adiabatic potential energy surfaces (APES) approach, the HOMO, LUMO energies, as well as the vertical and adiabatic ionization potentials (IP<sub>V</sub>, IP<sub>A</sub>) and electron affinities (EA<sub>V</sub>, EA<sub>A</sub>) of molecule 6 at B3LYP-D3/6-31G (d, p) level: All the data are in unit of eV.

| $\lambda^+$ | $\lambda^-$ | <b>HOMO</b> | <b>LUMO</b> | <b>IP<sub>V</sub></b> | <b>IP<sub>A</sub></b> | <b>EA<sub>V</sub></b> | <b>EA<sub>A</sub></b> |
|-------------|-------------|-------------|-------------|-----------------------|-----------------------|-----------------------|-----------------------|
| 0.285       | 0.266       | -5.05       | -2.02       | 6.14                  | 6.00                  | -0.89                 | -1.02                 |



**Table S7** The transfer integrals of hole ( $V_{\text{hole}}$ ) and electron ( $V_{\text{electron}}$ ) (absolute value) for different hopping pathways and charge mobilities of hole and electron for molecule 6 based on B3LYP-D3/6-31G(d, p) level.

| Molecule                                          | Pathway        | Distance (Å) | $V_{\text{hole}}$ (meV) | $V_{\text{electron}}$ (meV) |
|---------------------------------------------------|----------------|--------------|-------------------------|-----------------------------|
| <b>6</b>                                          | 1, 2, 3, 4     | 6.93         | 18.4                    | 3.0                         |
|                                                   | 5, 6           | 10.99        | 6.0                     | 3.5                         |
|                                                   | 7, 8, 9, 10    | 13.38        | 0.3                     | 2.0                         |
|                                                   | 11, 12, 13, 14 | 17.08        | $1.3 \times 10^{-3}$    | $6.9 \times 10^{-4}$        |
|                                                   | 15, 16         | 13.98        | 2.2                     | 2.9                         |
|                                                   | 17, 18         | 13.69        | 5.9                     | 4.2                         |
| $\mu$ ( $\text{cm}^2\text{V}^{-1}\text{s}^{-1}$ ) |                |              | 0.02                    | $3.2 \times 10^{-3}$        |

## References

1. T. H. El-Assaad, M. Auer, R. Castañeda, K. M. Hallal, F. M. Jradi, L. Mosca, R. S. Khnayzer, D. Patra, T. V. Timofeeva, J.-L. Brédas, E. J. W. List-Kratochvil, B. Wex, and B. R. Kaafarani, *J. Mater. Chem. C*, 2016, **4**, 3041–3058.
